# Supplementary material
Source: PubMed Central journal article supplement (PMC3628569)
Supplement: mmc1.pdf [file mmc1.pdf]

## Cooperative heparin-mediated oligomerization of Fibroblast Growth Factor-1 (FGF1) precedes recruitment of FGFR2 to ternary complexes

Alan Brown<sup>1</sup>, Christopher J. Robinson<sup>2</sup>, John T. Gallagher<sup>2</sup> and Tom L. Blundell<sup>1</sup>

<sup>1</sup>Department of Biochemistry, University of Cambridge, Cambridge, UK and <sup>2</sup>Cancer Research UK Glyco-Oncology Group, School of Cancer and Imaging Sciences, Paterson Institute for Cancer Research, University of Manchester, Manchester, UK

### Supporting Material

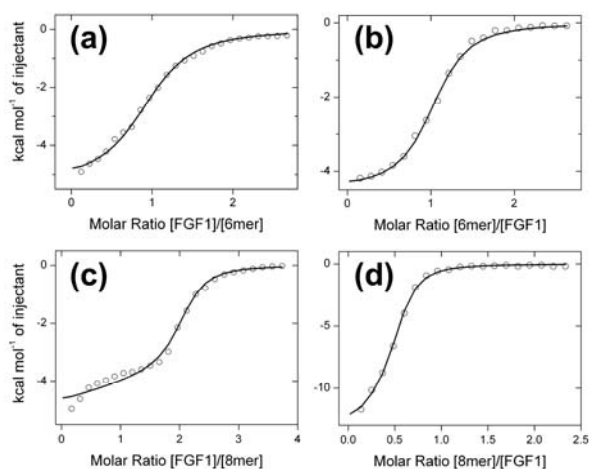

**Figure S1:** Analysis of the FGF1-heparin hexasaccharide interaction by direct (a) and reverse (b) titrations using a one-site binding model and analysis of the FGF1-heparin octasaccharide interaction by direct (c) and reverse (d) titrations using a two-site binding model.

| Titration | $N_1$ | $K_D1$<br>(nM) | $\Delta G_1$<br>(kcal mol <sup>-1</sup> ) | $\Delta H_1$<br>(kcal mol <sup>-1</sup> ) | $-T\Delta S_1$<br>(kcal mol <sup>-1</sup> ) | $N_2$ | $K_D2$<br>(nM) | $\Delta G_2$<br>(kcal mol <sup>-1</sup> ) | $\Delta H_2$<br>(kcal mol <sup>-1</sup> ) | $-T\Delta S_2$<br>(kcal mol <sup>-1</sup> ) |
|-----------|-------|----------------|-------------------------------------------|-------------------------------------------|---------------------------------------------|-------|----------------|-------------------------------------------|-------------------------------------------|---------------------------------------------|
| FGF1-6mer | 1.02  | 467            | -8.7                                      | -4.4                                      | 4.3                                         |       |                |                                           |                                           |                                             |
| 6mer-FGF1 | 0.97  | 671            | -8.5                                      | -5.3                                      | -3.2                                        |       |                |                                           |                                           |                                             |
| FGF1-8mer | 0.5   | 340            | 0.6                                       | -360.0                                    | -360.6                                      | 0.25  | 342            | 13.1                                      | -354.5                                    | -341.4                                      |
| 8mer-FGF1 | 1.00  | 115            | -5.4                                      | -250.5                                    | -254.1                                      | 1.00  | 116            | 13.6                                      | -242.4                                    | -256.0                                      |

**Table S1:** Thermodynamic parameters for the interaction between FGF1 and heparin hexa- and deca-saccharide as analyzed by either a one-site or two-site model.
